# Supplementary material for: Protective Effects of Lycium barbarum Polysaccharide on 6-OHDA-Induced Apoptosis in PC12 Cells through the ROS-NO Pathway
Source: PubMed Central journal article supplement (PMC6272587; doi:10.3390/molecules20010293), 2014-12-24
Supplement: molecules-20-00293-s001.pdf [file molecules-20-00293-s001.pdf]

## Supplementary Materials

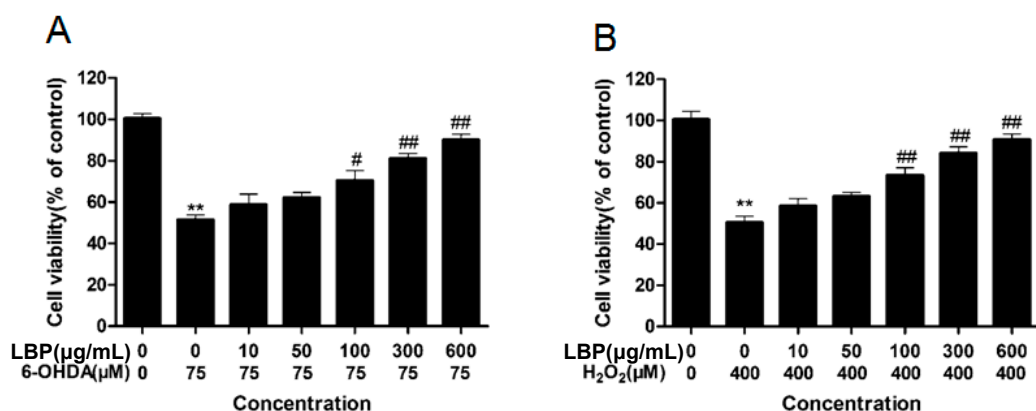

**Figure S1.** Cell viability was determined by MTT assay. Primary cells were preincubated with different concentrations of LBP (A) for 24 h, and then exposed to 6-OHDA (75 μM) for 24 h. Data are expressed as percentage of untreated control cells ± SD ( $n = 3$ ). \*\*  $p < 0.01$  compared with untreated control cells; #  $p < 0.05$ , ##  $p < 0.01$  compared with 6-OHDA-treated cells. PC12 cells were preincubated with different concentrations of LBP (B) for 24 h, and then exposed to H<sub>2</sub>O<sub>2</sub> (400 μM) for 24 h. Data are expressed as percentage of untreated control cells ± SD ( $n = 3$ ). \*\*  $p < 0.01$  compared with untreated control cells; #  $p < 0.05$ , ##  $p < 0.01$  compared with H<sub>2</sub>O<sub>2</sub>-treated cells.

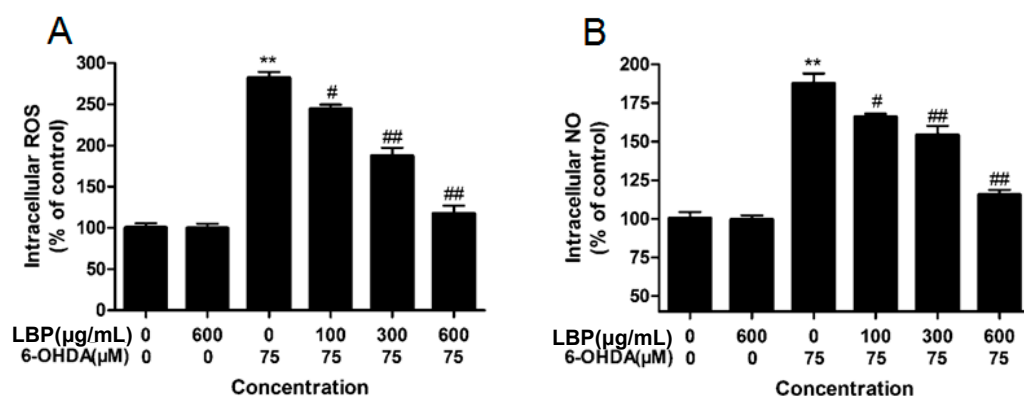

**Figure S2.** Effect of LBP on 6-OHDA-induced accumulation of intracellular ROS (A) and NO (B) levels in primary cells. Cells were exposed to 6-OHDA without or with different concentrations of LBP for 24 h. Data are expressed as percentage of untreated control cells ± SD ( $n = 6$ ). \*\*  $p < 0.01$  compared with untreated control cells; #  $p < 0.05$ , ##  $p < 0.01$  compared with 6-OHDA-treated cells.

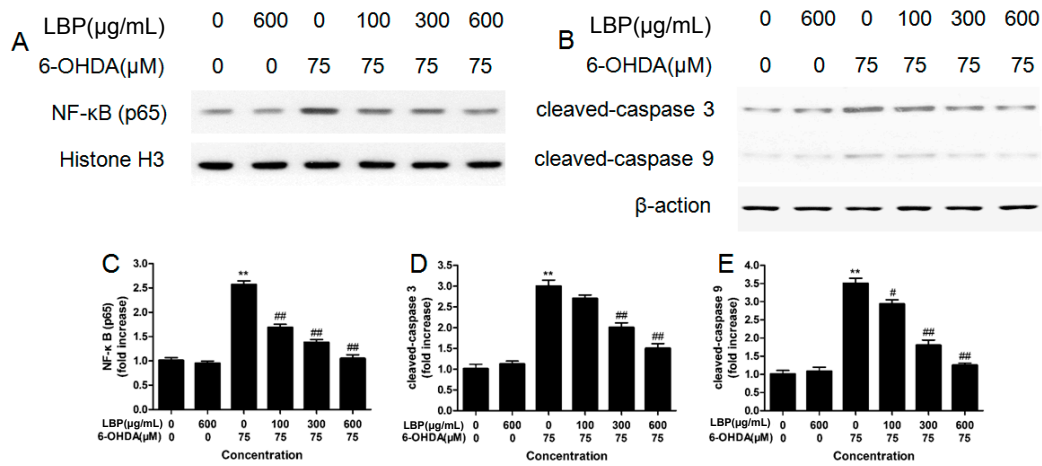

**Figure S3.** Effects of LBP on the activation of NF- $\kappa$ B, Caspase 3 and Caspase 9. PC12 cells were exposed to 6-OHDA (75  $\mu\text{M}$ ) with or without various concentrations of LBP for 24 h. The changes in expression of NF- $\kappa$ B in the nuclear extractions were examined by Western blot analysis (A,B). NF- $\kappa$ B (p65), caspase 3 and caspase 9 activities were measured (C–E). Data obtained from quantitative densitometry were presented as mean  $\pm$  SD for three independent experiments. \*\*  $p < 0.01$  compared with untreated control cells; #  $p < 0.05$ , ##  $p < 0.01$  compared with 6-OHDA-treated cells.

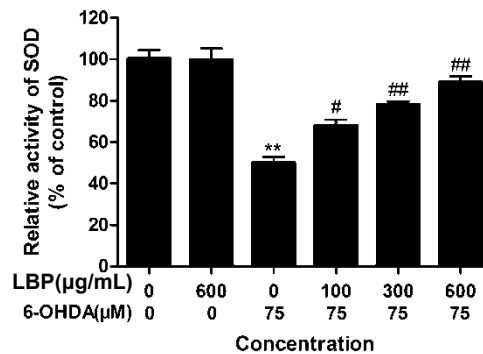

**Figure S4.** Effect of LBP on enzymatic activity of SOD in 6-OHDA-treated cells. PC12 cells were pretreated with different concentrations of LBP, and then exposed to 75  $\mu\text{M}$  6-OHDA for 24 h. Data are expressed as percentage of untreated control cells  $\pm$  SD ( $n = 6$ ). \*\*  $p < 0.01$  compared with untreated control cells; #  $p < 0.05$ , ##  $p < 0.01$  compared with 6-OHDA-treated cells.
